# Supplementary material
Source: PubMed Central journal article supplement (PMC3787127)

## Supplemental Figures

**Supplemental Figure 1: Analysis of Fine Motor Skills tested in the SRC<sup>-/-</sup> mice. (A-C)** Grip strength analysis of WT and SRC<sup>-/-</sup> mice. **(B)** Both SRC2<sup>-/-</sup> female and male mice display decreased grip strength. **(C)** SRC3<sup>-/-</sup> female mice show a decrease in grip strength. **(D-F)** Wire hang analysis of WT and SRC<sup>-/-</sup> mice. **(F)** SRC3<sup>-/-</sup> female mice display decreased ability in the wire hang assay. **(G-I)** Dowel test analysis of WT and SRC<sup>-/-</sup> mice. **(J-L)** Whole body weight analysis of WT and SRC<sup>-/-</sup> mice. **(K)** SRC2<sup>-/-</sup> female mice show a reduction in body weight. **(L)** Both SRC3<sup>-/-</sup> male and female mice show display a lower body weight. Mean ± SEM; \*p<0.05.

# Supplemental Figure 1

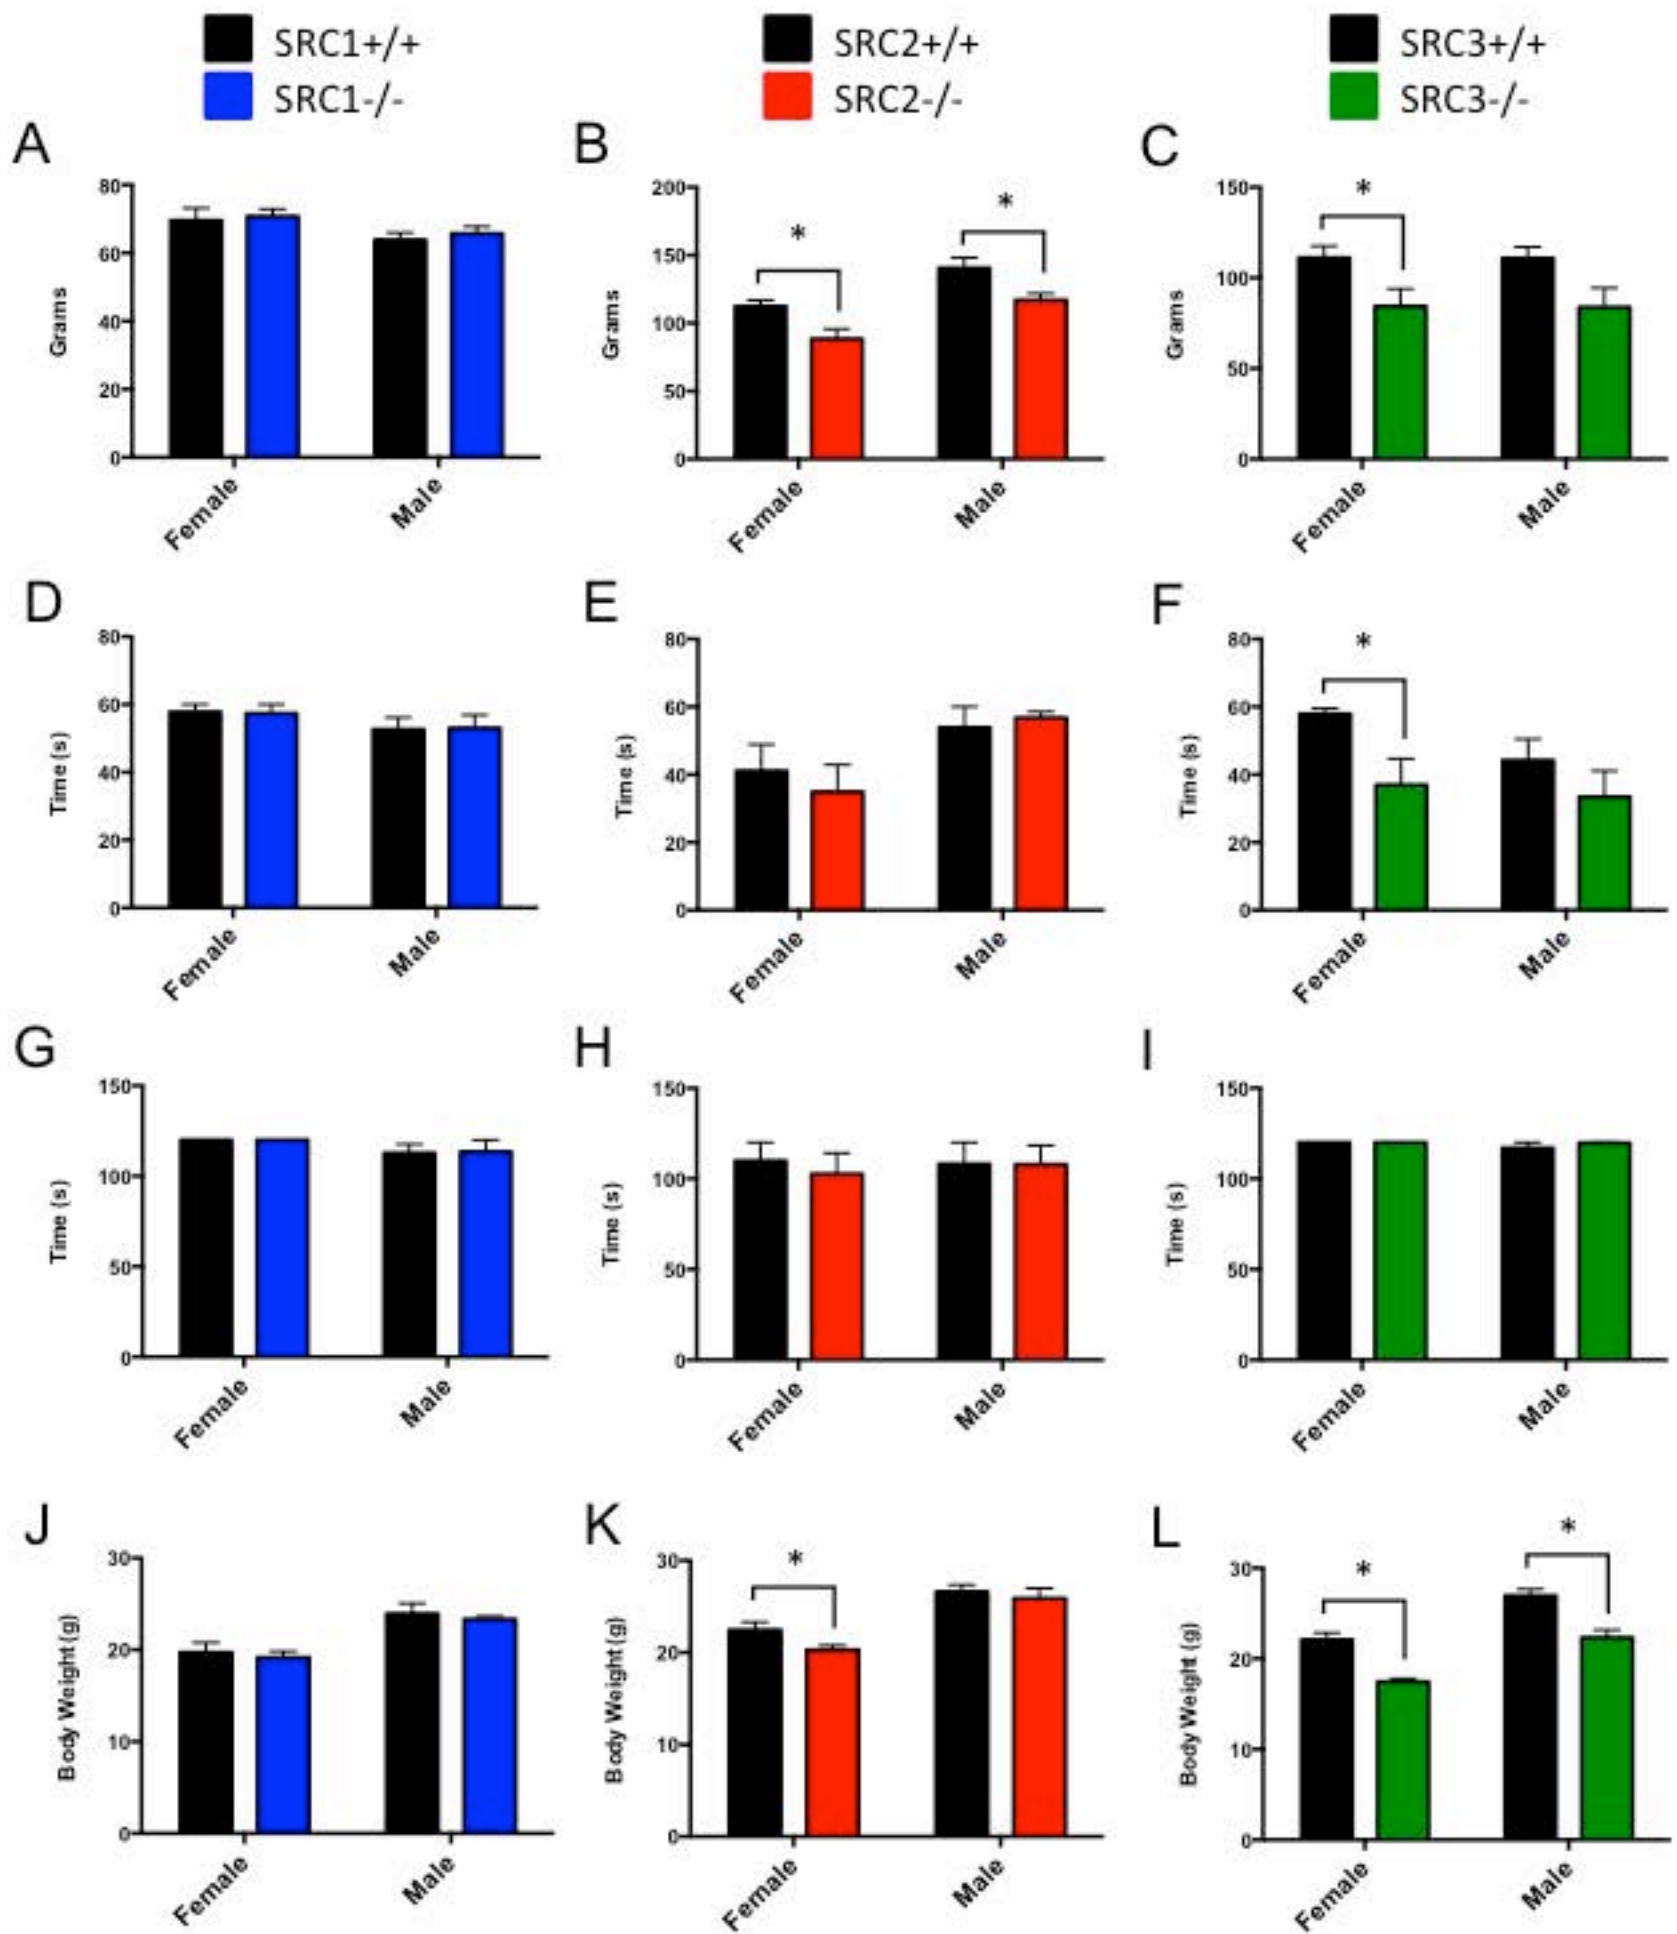

Supplement: supp_me.2013-1192_f1.pdf [file supp_me.2013-1192_f1.pdf]
